# Supplementary material
Source: publisher site journal article supplement (https://www.dovepress.com/article/577575)
Supplement: Supplementary file 1 [file 577575_Supplementary%20Material%20.docx]

**Supplementary material 1 – Chinese Questionnaire 北京大学第一医院特需门诊服务体验的满意度调查**

您好!本次调查旨在了解您在我院特需门诊就诊期间的满意度及体验，旨在发现目前特需服务存在的问题，为进一步提升服务质量、增强患者满意度提供参考。问卷填写前请知晓以下信息：（1）本项问卷调查不涉及个人敏感隐私信息（2）如果您决定参加本项研究，您参加研究及在研究中的涉及的信息均属保密（3）本项研究结果发表时，也将不会披露您个人的任何隐私

请根据您的真实感受填写，在“○”内打“√”或在1（非常不满意）至5（非常满意）内进行满意度项目评分，非常感谢您的配合!

您是否知情并愿意参加本次问卷调查研究（在“○”内打“√”）

| ○是 |
| --- |
| ○否 |

**1.人口统计学资料**（在“○”内打“√”）

（1）您的性别

| ○女 |
| --- |
| ○男 |

（2）您的年龄

| ○0-44 |
| --- |
| ○45-59 |
| ○60及以上 |

（3）您的受教育程度

| ○高中及以下 |
| --- |
| ○大专或本科 |
| ○研究生及以上 |

（4）挂号医师职称

○主治医师

○副主任医师

○主任医师

（5）您的就医来源

| ○非本地患者 |
| --- |
| ○本地患者 |

**2. 核心就医流程**（在“○”内打“√”）

（1）您本次费用的支付方式

| ○个人自付 |
| --- |
| ○医疗保险 |

（2）门诊挂号类型

| ○特需门诊 |
| --- |
| ○普通门诊 |

（3）从特需门诊报道至就诊前的等待时间

| ○≤30 |
| --- |
| ○31-60 |
| ○>60 |

（4）在特需门诊就诊时医生与您的交流时间

| ○≤20 |
| --- |
| ○>20 |

（5）您是否在人工收费处缴费？

| ○是 |
| --- |
| ○否 |

（6）您是否在检验科检查？

| ○是 |
| --- |
| ○否 |

（7）您是否在医学影像科检查？

| ○是 |
| --- |
| ○否 |

（8）您是否在超声影像科检查？

| ○是 |
| --- |
| ○否 |

（9）您是否在核医学科检查？

| ○是 |
| --- |
| ○否 |

（10）您是否在内镜室检查？

| ○是 |
| --- |
| ○否 |

（11）您是否在特需门诊购买药品？

| ○是 |
| --- |
| ○否 |

**3.就医体验满意度评估体系**（输入1（非常不满意）到5（非常满意）的数字）

（1）您对就诊等待时间的总体满意度

_____________________________________________________________________

（2）医生对您的态度尊重

_____________________________________________________________________

（3）医生尽可能地以遮挡等方式保护您的隐私

_____________________________________________________________________

（4）医生给予您相关宣教指导和资料

_____________________________________________________________________

（5）医生就疾病诊断治疗及预后与您交流

_____________________________________________________________________

（6）医生就用药原因、如何用药及不良反应等注意事项与您交流

____________________________________________________________________

（7）医生就建议的检查项目和方案开展向您告知

_____________________________________________________________________

（8）医生就随诊相关事项给您安排并向您告知

_____________________________________________________________________

（9）就诊时护士对您的态度尊重

_____________________________________________________________________

（10）护士仔细倾听您讲话

_____________________________________________________________________

（11）护士回答您的问题完整准确

_____________________________________________________________________

（12）您对门诊导诊及志愿者服务满意

_____________________________________________________________________

（13）您的抱怨和不满得到及时回应

_____________________________________________________________________

（14）您对就诊环境满意

_____________________________________________________________________

（15）您对医院内的路标指示满意

_____________________________________________________________________

（16）医院的厕所清洁无味

_____________________________________________________________________

（17）门诊就诊体验的总体满意度

Supplementary material 2 – English Questionnaire.

**A Study Regarding Patient Experience and Satisfaction with the VIP Outpatient Services at Peking University First Hospital**

Thank you for choosing the VIP Outpatient Service at Peking University First Hospital. This survey aims to gain a deeper understanding of your satisfaction and personal experience following your recent visit. Your feedback is paramount in helping us identify opportunities for improvement and enhance the quality of our specialized care. Please review the following information before proceeding: (1) This questionnaire does not collect any personally sensitive information. (2) Your participation and all provided data will be kept strictly confidential. (3) Any published findings will be based on aggregated data, ensuring your complete anonymity.

Please reflect on your genuine experience and indicate your responses by placing a checkmark (√) inside the corresponding circle (○) or rate your satisfaction on a scale from 1 (Very dissatisfied) to 5 (Very satisfied). We sincerely appreciate your time and valuable contribution to our service enhancement efforts.

I understand the purpose of this survey and voluntarily agree to participate. (Place a checkmark (√) inside the corresponding circle (○))

| ○Yes |
| --- |
| ○No |

1. **Demographic characteristics** (Place a checkmark (√) inside the corresponding circle (○))
2. Gender

| ○Female |
| --- |
| ○Male |

1. Age

| ○0-44 |
| --- |
| ○45-59 |
| ○≥ 60 |

1. Educational status

| ○High school and below |
| --- |
| ○Undergraduate/junior college |
| ○Postgraduate and above   1. Registered physician tittle   ○**Senior resident**  ○**Associate chief physician**  ○**Chief physician**   1. Patient source |

○Non-local patients

○Local patients

1. **Core healthcare process** (Place a checkmark (√) inside the corresponding circle (○))
2. Payment method

| ○No social health insurance |
| --- |
| ○Medical insurance   1. **Type of Outpatient Registration**   ○VIP outpatient |

○General outpatient

1. Waiting time before consultation

| ○≤30 |
| --- |
| ○31-60 |
| ○>60 |

1. Length of communication with the doctor

| ○≤20 |
| --- |
| ○>20 |

1. Whether the payment made at the outpatient window？

| ○Yes |
| --- |
| ○No |

1. Whether you check up in the clinical laboratory？

| ○Yes |
| --- |
| ○No |

1. Whether you check up in the medical imaging department？

| ○Yes |
| --- |
| ○No |

1. Whether you check up in the ultrasound department？

| ○Yes |
| --- |
| ○No |

1. Whether you check up in the nuclear medicine department？

| ○Yes |
| --- |
| ○No |

1. Whether you check up in the endoscopy center？

| ○Yes |
| --- |
| ○No |

1. Whether you buy medicine in outpatient？

| ○Yes |
| --- |
| ○No |

1. **Satisfaction evaluation system of medical experience** (Rate your satisfaction on a scale from 1 (Very dissatisfied) to 5 (Very satisfied))
2. Overall satisfaction of waiting time

________________________________________________________________________

1. Satisfaction with behaviour of treating doctor

________________________________________________________________________

1. Doctor explained your treatment and respect privacy

________________________________________________________________________

1. Doctor gave some guidance and materials

________________________________________________________________________

1. Doctor diagnosed diseases

________________________________________________________________________

1. Doctor explained why and how to use medicine

________________________________________________________________________

1. Doctor advised the examination and treatment plan

________________________________________________________________________

1. Doctor informed follow-up arrangements

________________________________________________________________________

1. Satisfaction with behaviour of nurses

________________________________________________________________________

1. Nurses listen to your questions and problems

________________________________________________________________________

1. Nurses answer the questions correctly

________________________________________________________________________

1. Satisfaction with hospital services and hospital staff

________________________________________________________________________

1. Satisfaction with responsiveness of your needs

________________________________________________________________________

1. Satisfaction with outpatient environment

________________________________________________________________________

1. Satisfaction with outpatient guidepost

________________________________________________________________________

1. Satisfaction with hygiene situation of the toilet

________________________________________________________________________

1. **Overall satisfaction** of the outpatient visit

________________________________________________________________________
